# Supplementary material for: Tet1 Suppresses p21 to Ensure Proper Cell Cycle Progression in Embryonic Stem Cells
Source: MDPI journal article supplement (doi:10.3390/cells11081366), 2022-04-17
Supplement: s1 [file s1]

# Supplementary Information

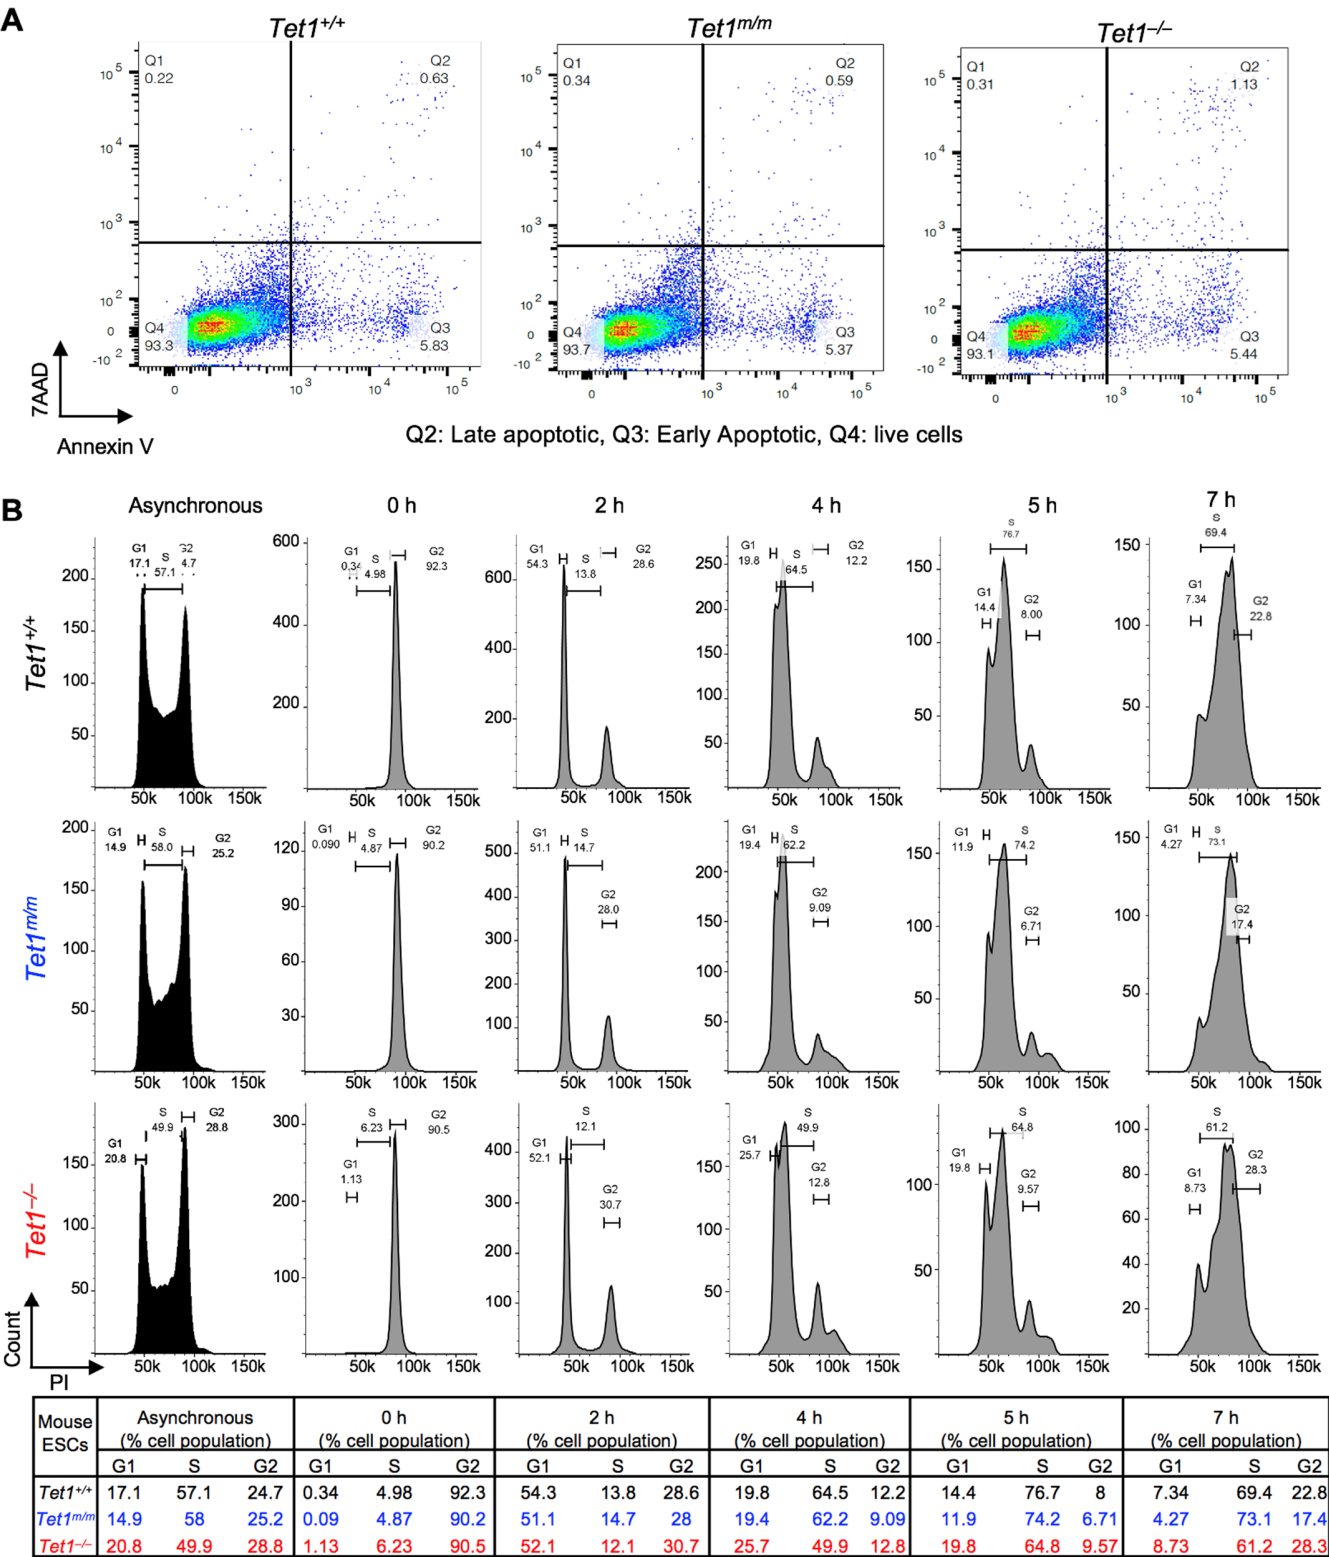

**Figure S1:** Apoptosis and cell cycle profiles of *Tet1*<sup>+/+</sup>, *Tet1*<sup>m/m</sup> and *Tet1*<sup>-/-</sup> mESCs are analyzed by flow cytometry. (A) Analysis of Annexin V and 7AAD-stained ESCs of indicated genotypes by flow

cytometry; % cells in each quadrant are shown. **(B)** Cell cycle analysis of asynchronous ESCs and synchronized (Nocodazole block for 16 h) ESCs at indicated time-points after Nocodazole release. Cells were stained by PI and subjected to a flow cytometry analysis; % cells in each phase are summarized in Table S1 below. Note that in *Tet1*<sup>-/-</sup> ESCs there was reduced % ESCs in the S phase and increased % ESCs in the G1 phase, particularly at 4 and 5 h post-release.

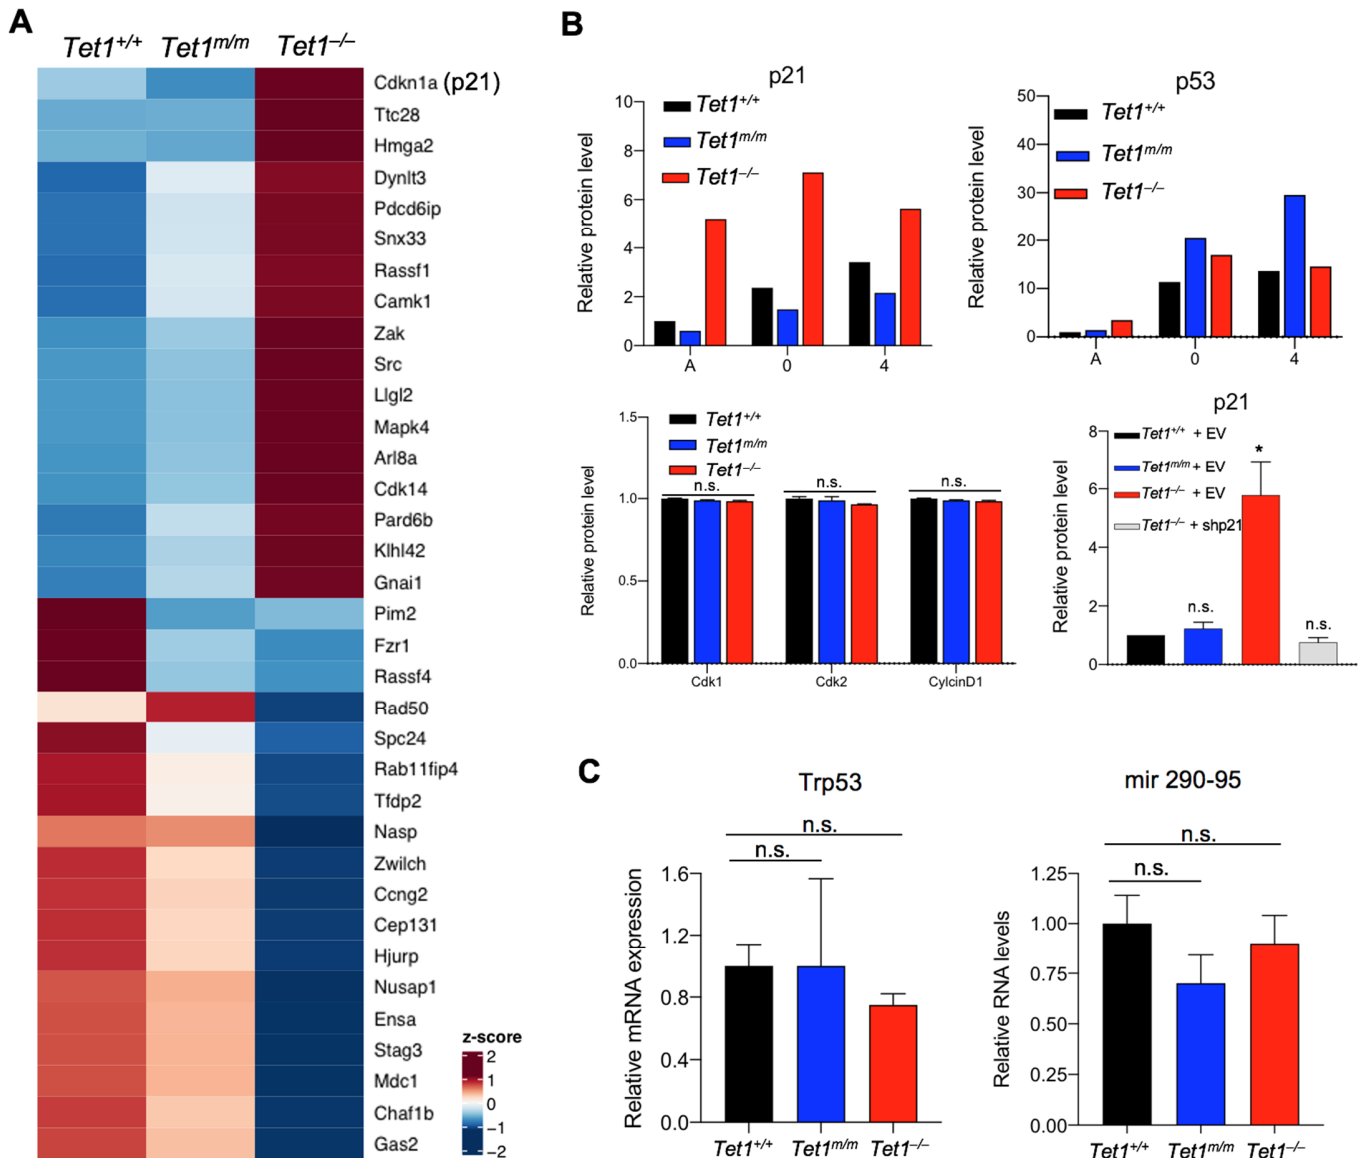

**Figure S2:** mRNA and protein levels of cell cycle regulators are quantified in *Tet1*<sup>+/+</sup>, *Tet1*<sup>m/m</sup> and *Tet1*<sup>-/-</sup> mESCs. **(A)** Heatmap of the expression of genes in cell cycle regulation gene ontology terms, uniquely deregulated in *Tet1*<sup>-/-</sup>, but not in *Tet1*<sup>m/m</sup> and *Tet1*<sup>+/+</sup> ESCs based on our published RNA-seq data (see Methods). **(B)** Quantification of protein levels of cell cycle regulators as assessed by Western blot in Figures 2B, 2C and 2E. All signals were normalized with the corresponding actin signals. **(C)** Quantification of RNA levels of p53 and pri-mir290-95 cluster in ESCs of indicated genotypes by RT-

qPCR. Data normalized to *Gapdh*.  $n = 3$  ESC lines of each genotype. For all panels, error bars represent Stdev. \*: statistically significant; n.s.: not significant when compared with wild type or control.

**Table S1:** List of oligos used in study.

| Name                      | Sequence (5'-3')         | Purpose                 | Reference  |
|---------------------------|--------------------------|-------------------------|------------|
| Tet1 RT-qPCR For          | TGCACCTACTGCAAGAATCG     | Real time qPCR          | [14]       |
| Tet1 RT-qPCR Rev          | AAATTGGCATCACAGCTTCC     | Real time qPCR          | [14]       |
| Nanog RT-qPCR For         | AAGCAGAAGATGCGGACTGT     | Real time qPCR          | [15]       |
| Nanog RT-qPCR Rev         | ATCTGCTGGGAGGCTGAGGTA    | Real time qPCR          | [15]       |
| Pou5f1 RT-qPCR For        | ACATCGCCAATCAGCTTGG      | Real time qPCR          | [15]       |
| Pou5f1 RT-qPCR Rev        | AGAACCATACTCGAACCACATCC  | Real time qPCR          | [15]       |
| Bin1 RT-qPCR For          | CAAGGCAAACCTACAGGCTCATC  | Real time qPCR          | [16]       |
| Bin1 RT-qPCR Rev          | CCACGTTCATCTCCTCGAAC     | Real time qPCR          | [16]       |
| Eomes RT-qPCR For         | TGCAAGAGAAAGCGCCTGTCTC   | Real time qPCR          | [17]       |
| Eomes RT-qPCR Rev         | CAATCCAGCACCTTGAACGACC   | Real time qPCR          | [17]       |
| Gapdh RT-qPCR For         | GTGTTCTACCCCCAATGTGT     | Real time qPCR          | [14]       |
| Gapdh RT-qPCR Rev         | ATTGTCATACCAGGAAATGAGCTT | Real time qPCR          | [14]       |
| p21 RT-qPCR For           | CCATGAGCGCATCGCAATC      | Real time qPCR          | [18]       |
| p21 RT-qPCR Rev           | CCTGGTGATGTCCGACCTG      | Real time qPCR          | [18]       |
| p27 RT-qPCR For           | GGCCCGGTCAATCATGAA       | Real time qPCR          | [19]       |
| p27 RT-qPCR Rev           | TTGCGCTGACTCG CTTCTTC    | Real time qPCR          | [19]       |
| p15 RT-qPCR For           | GGTGGGTGCAGTCAGTACCT     | Real time qPCR          | [19]       |
| p15 RT-qPCR Rev           | CGAGCTGGAGGTGACTTCTC     | Real time qPCR          | [19]       |
| p16 RT-qPCR For           | CAACGCCCCGAACTCTTTC      | Real time qPCR          | [19]       |
| p16 RT-qPCR Rev           | GCAGAAGAGCTGCTACGTGAAC   | Real time qPCR          | [19]       |
| p19 RT-qPCR For           | CGGTATCCACTATGCTTCTGGAA  | Real time qPCR          | [19]       |
| p19 RT-qPCR Rev           | CCGCTGCGCCACTCAA         | Real time qPCR          | [19]       |
| Trp53 RT-qPCR For         | TGCTCACCTGGCTAAAGTT      | Real time qPCR          | [20]       |
| Trp53 RT-qPCR Rev         | GTCCATGCAGTGAGGTGATG     | Real time qPCR          | [20]       |
| Pri-mir290-95 RT-qPCR For | GAACCTCACGGGAAGTGACC     | Real time qPCR          | [21]       |
| Pri-mir290-95 RT-qPCR Rev | TGCCCACAGGAGAGACTCAA     | Real time qPCR          | [21]       |
| p21 For                   | GGCCGACGCTATAAGGAGG      | Tet1 ChIP-qPCR          | This paper |
| p21 Rev                   | CTATTGTTCCCTGCCACGAAG    | Tet1 ChIP-qPCR          | This paper |
| p21 For                   | GTGTAGGAAGGTGACCAGGC     | Ezh2/H3K27me3 ChIP-qPCR | This paper |
| p21 Rev                   | CCCCAAATGCCAAACCCAAG     | Ezh2/H3K27me3 ChIP-qPCR | This paper |
